# Supplementary material for: Surface oxygen vacancies of TiO2 nanorods by electron beam irradiation for efficient photoelectrochemical water splitting
Source: Royal Society of Chemistry journal article supplement (doi:10.1039/d1ce00205h), 2021-01-01
Supplement: d1ce00205h1.pdf [file d1ce00205h1.pdf]

## Supplementary Information

### Surface Oxygen Vacancies of TiO<sub>2</sub> Nanorods by Electron Beam Irradiation for Efficient Photoelectrochemical Water Splitting

Jing Huang<sup>a</sup>, Tao Chen<sup>b</sup>, Mingyang Zhao<sup>a</sup>, Ping Yi<sup>a</sup>, Feifan Zhao<sup>a</sup>, Bing He<sup>a</sup>, Yang Wang<sup>a</sup>, Yihuang Chen<sup>c</sup>, Xueqin Liu<sup>a</sup>, and Zhen Li<sup>a,\*</sup>

<sup>a</sup>Engineering Research Center of Nano-Geomaterials of Ministry of Education, Faculty of Materials Science and Chemistry, China University of Geosciences, Wuhan, Hubei, 430074, China

<sup>b</sup>Hubei Key Laboratory of Radiation Chemistry and Functional Materials, Hubei University of Science and Technology, Xianning, Hubei, 437100, China

<sup>c</sup>College of Chemistry and Materials Engineering, Wenzhou University, Wenzhou, Zhejiang 325035, China

\*Corresponding authors.

E-mail addresses: zhenli@cug.edu.cn (Z. Li).

## Contents

|                                                                                    |           |
|------------------------------------------------------------------------------------|-----------|
| <b>I . Calculation .....</b>                                                       | <b>3</b>  |
| <b>II . Morphology of the photoanodes.....</b>                                     | <b>4</b>  |
| <b>III. XPS spectra of the photoanodes.....</b>                                    | <b>5</b>  |
| <b>IV. Photoelectrochemical analysis of the photoanodes.....</b>                   | <b>6</b>  |
| <b>V. Light harvesting efficiency and Electron flux of the<br/>photoandes.....</b> | <b>7</b>  |
| <b>VI. Comparison of J-V curves measured for WO and SO.....</b>                    | <b>8</b>  |
| <b>VII. Comparison study of PEC performance .....</b>                              | <b>9</b>  |
| <b>VIII. Fitting results of Nyquist plots .....</b>                                | <b>11</b> |
| <b>IX. References .....</b>                                                        | <b>12</b> |

## I . Calculation

### Applied bias photon-to-current efficiency (ABPE)

ABPE were calculated by the equation (1)

$$ABPE = \frac{I(mA \cdot cm^{-2}) \times (1.23 - V_{bias})(V)}{P_{light}(mW \cdot cm^{-2})} \times 100\% \quad (1)$$

where I is the measured photocurrent density at corresponding wavelength, and  $P_{light}$  is the measured light power density at that wavelength (100 mW cm<sup>-2</sup> in this work).

$V_{bias}$  is the applied bias between WE and RHE.

### Calculation of carrier concentration (Nd)

The Nd of TiO<sub>2</sub>, and EBI-TiO<sub>2</sub> photoanodes through the M-S plots were calculated by the equation (2):

$$Nd = \frac{2}{e\epsilon\epsilon_0} \left[ \frac{d(1/C^2)}{dv} \right]^{-1} \quad (2)$$

where  $\epsilon_0$  is the permittivity of free space (8.86×10<sup>-12</sup> F/m),  $\epsilon$  is the dielectric constant of TiO<sub>2</sub>, and e is electron charge (1.6×10<sup>-19</sup> C). and d(1/C<sup>2</sup>)/dv is the slope of the curve shown in M-S plots (**Fig. 6a**).

### Charge separation efficiency ( $\eta$ )

The photocurrent ( $J_{ph}$ ) can be identified as a product of the theoretical photocurrent ( $J_{abs}$ ) dependent on the light absorption, the charge separation efficiency ( $\eta_{sep}$ ), and the interfacial charge transfer efficiency ( $\eta_{inj}$ ), which is expressed by the following relation:

$$J_{ph} = J_{abs} \times \eta_{sep} \times \eta_{inj} \quad (3)$$

With the addition of a scavenger (Na<sub>2</sub>SO<sub>3</sub>),  $\eta_{inj}$  is equal to 1, and thus,  $\eta_{sep}$  can be calculated as the following relationship:

$$\eta_{sep} = \frac{J_{sulfite}}{J_{abs}} \times 100\% \quad (4)$$

$$\eta_{inj} = \frac{J_{ph}}{J_{sulfite}} \times 100\% \quad (5)$$

## II. Morphology of the photoanodes

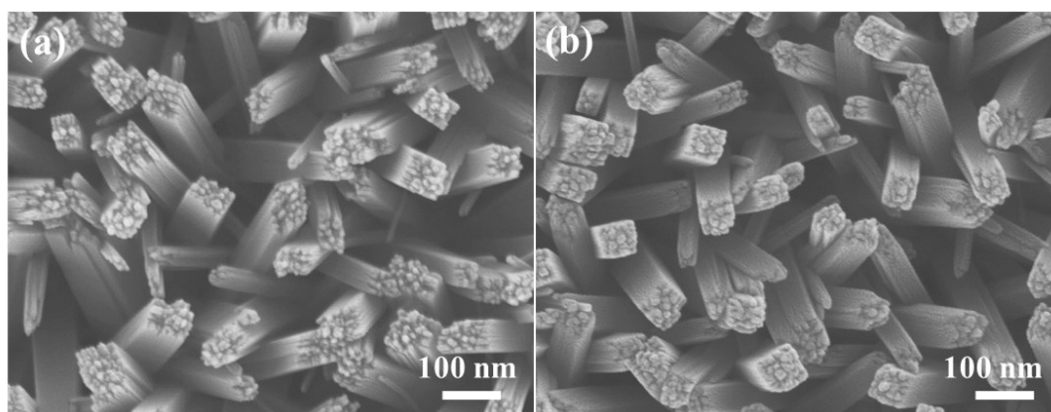

**Fig. S1** SEM images of (a) TiO<sub>2</sub> and (b) EBI-TiO<sub>2</sub>.

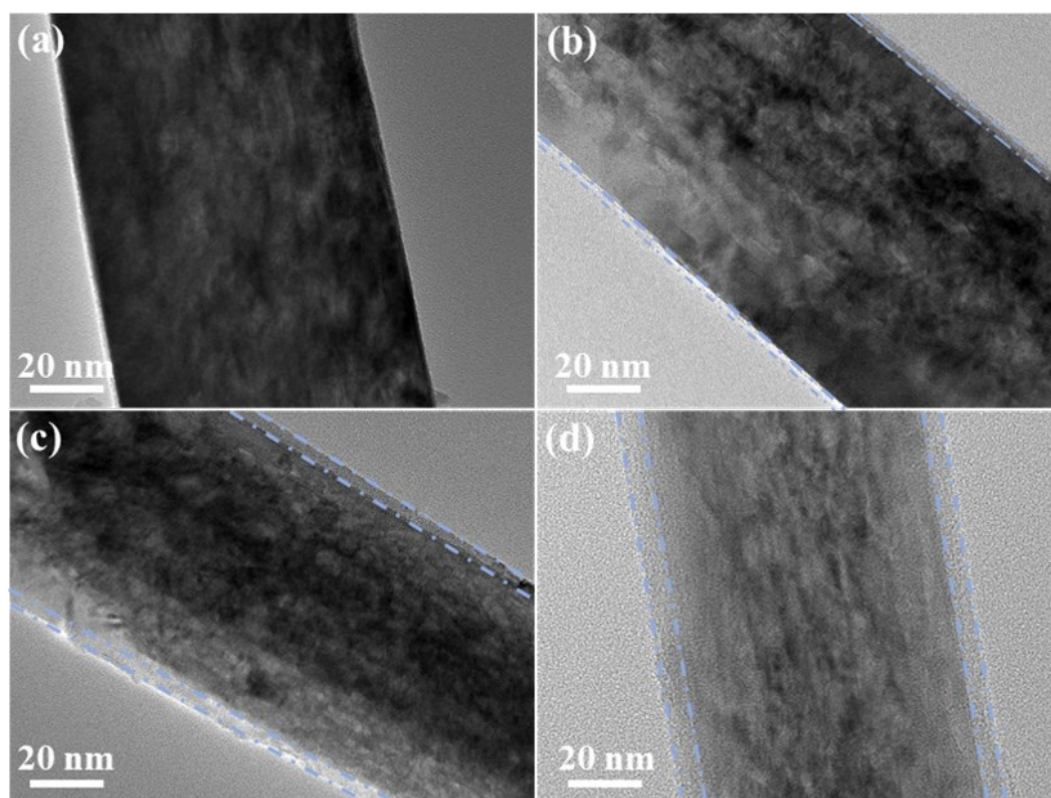

**Fig. S2** TEM images of a single nanorod of (a) TiO<sub>2</sub>, (b) EBI-TiO<sub>2</sub>-15, (c) EBI-TiO<sub>2</sub>-30, and (d) EBI-TiO<sub>2</sub>-60.

### III. XPS spectra of the photoanodes

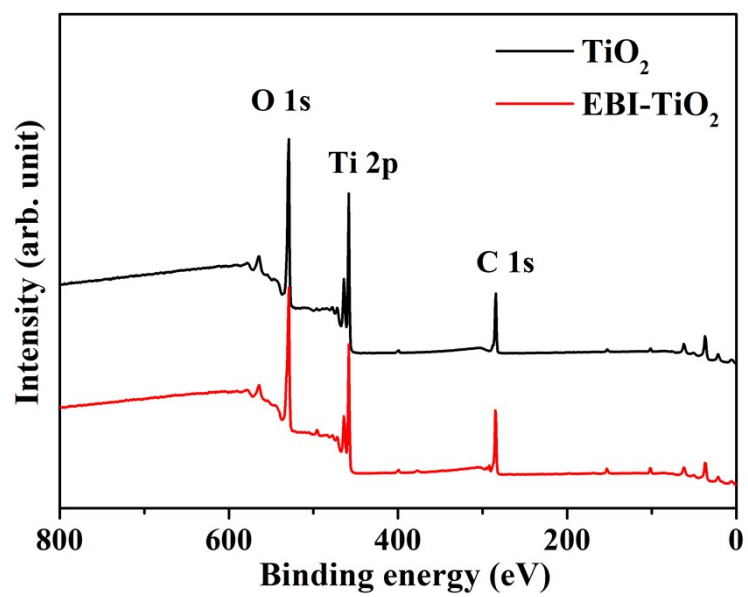

Fig. S3 The survey XPS spectra of  $\text{TiO}_2$  and  $\text{EBI-TiO}_2$ .

#### IV. Photoelectrochemical analysis of the photoanodes

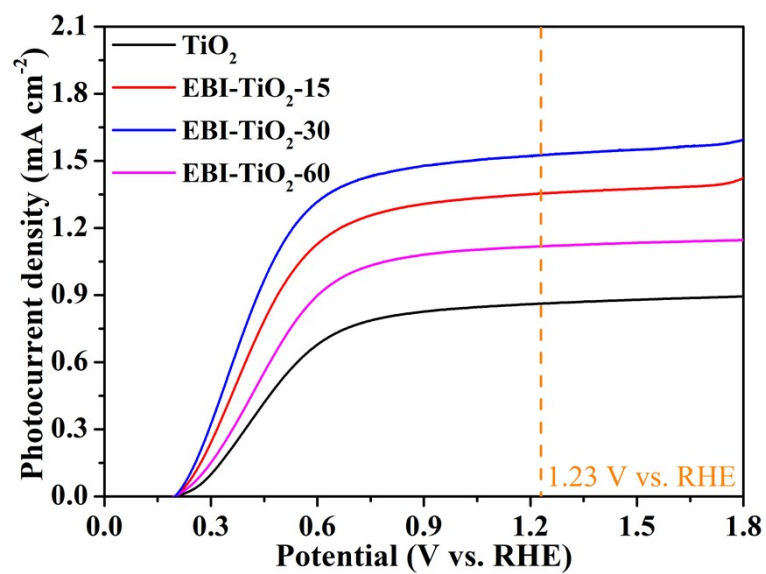

**Fig. S4** Photocurrent density-potential (J-V) curves of EBI-TiO<sub>2</sub> with different irradiation dose.

## V. Light harvesting efficiency and Electron flux of the photoanodes

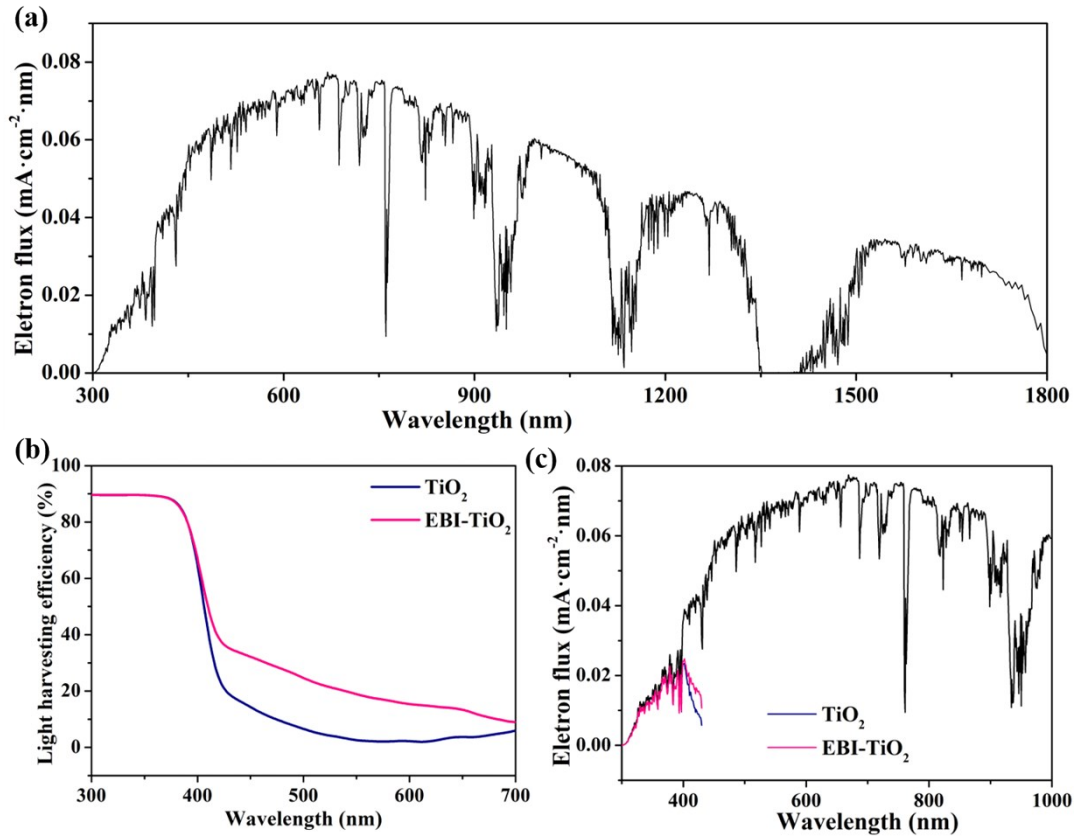

**Fig. S5** (a) Electron flux of AM 1.5G solar spectrum. (b) Light harvesting efficiency ( $\eta_{LHE}$ ) calculated from the absorption data ( $\eta_{ABS}$ ) using the equation  $\eta_{LHE} = (1 - 10^{-\eta_{ABS}}) \times 100\%$ , and (c) Electron flux of TiO<sub>2</sub> and EBI-TiO<sub>2</sub>.

## VI. Comparison of J-V curves measured for WO and SO

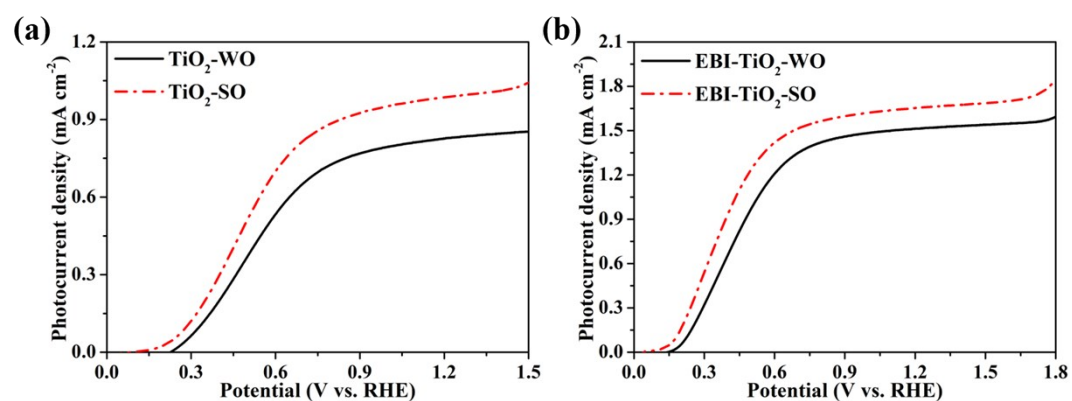

**Fig. S6** Comparison of J-V curves measured between (a) TiO<sub>2</sub> and (b) EBI-TiO<sub>2</sub> for water oxidation (WO) in 1 M NaOH solution and sulfite oxidation (SO) measured in 1 M NaOH with 1 M Na<sub>2</sub>SO<sub>3</sub> as the hole scavenger under AM 1.5 G illumination. sulfite oxidation.



## VII. Comparison study of PEC performance

**Table S1.** Comparison of PEC activity of TiO<sub>2</sub>-based photoanodes by recently developed V<sub>O</sub> generation methods and our EBI approach.

| Photoanode material                               | Methods                                            | Photocurrent density                              | Test condition                        | Reference |
|---------------------------------------------------|----------------------------------------------------|---------------------------------------------------|---------------------------------------|-----------|
| O&H-Rutile TiO <sub>2</sub> /Pd sample            | Pd chemical coating, then H <sub>2</sub> reduction | 1.5 mA cm <sup>-2</sup> at 1.23 V <sub>RHE</sub>  | 1 M NaOH                              | [1]       |
| “crystal-deficient” overlayer-TiO <sub>2</sub> NW | solution based lithium reduction                   | 2.0 mA cm <sup>-2</sup> at 1.23 V <sub>RHE</sub>  | 1 M NaOH                              | [2]       |
| high vacuum annealed TiO <sub>2</sub> NRAs        | annealed in high vacuum                            | 2.02 mA cm <sup>-2</sup> at 0.8 V <sub>SCE</sub>  | 0.5 M Na <sub>2</sub> SO <sub>4</sub> | [3]       |
| TiO <sub>2</sub> /STO/r-STO NWs                   | heated in NaBH <sub>4</sub> and Ar flow            | 0.32 mA cm <sup>-2</sup> at 1.23 V <sub>RHE</sub> | 1 M KOH                               | [4]       |
| TiO <sub>2</sub> -Ar                              | annealed in Ar atmosphere                          | 0.98 mA cm <sup>-2</sup> at 1.23 V <sub>RHE</sub> | 1 M NaOH                              | [5]       |
| H/TiO <sub>2</sub> nanoarrays                     | exposed to 10 Torr of H <sub>2</sub> at 400 °C     | 2.0 mA cm <sup>-2</sup> at 1.23 V <sub>RHE</sub>  | 1 M KOH                               | [6]       |
| flame-reduced TiO <sub>2</sub> NWs                | high temperature (>1000 °C) flame reduction        | 1.74 mA cm <sup>-2</sup> at 1.23 V <sub>RHE</sub> | 1 M KOH                               | [7]       |
| Co-Pi/EBI-TiO <sub>2</sub>                        | electron beam irradiation                          | 1.97 mA cm <sup>-2</sup> at 1.23 V <sub>RHE</sub> | 1 M NaOH                              | This work |

## VIII. Fitting results of Nyquist plots

*Table S2.* EIS results of the TiO<sub>2</sub> and EBI/Sn:TiO<sub>2</sub> NRs.

| <b>Samples</b>             | <b><math>R_s</math> (<math>\Omega</math>)</b> | <b><math>R_1</math> (<math>\Omega</math>)</b> | <b><math>CPE1</math> (<math>\mu\text{F}</math>)</b> | <b><math>R_2</math> (<math>\Omega</math>)</b> | <b><math>CPE2</math> (<math>\mu\text{F}</math>)</b> |
|----------------------------|-----------------------------------------------|-----------------------------------------------|-----------------------------------------------------|-----------------------------------------------|-----------------------------------------------------|
| <b>TiO<sub>2</sub></b>     | 38.59                                         | 312.50                                        | 0.43                                                | 12253.00                                      | 32.22                                               |
| <b>EBI-TiO<sub>2</sub></b> | 21.48                                         | 68.31                                         | 9.32                                                | 5691.00                                       | 32.32                                               |

## IX. References

- [1] Y. Xu, C. Zhang, L. Zhang, X. Zhang, H. Yao, J. Shi, *Energy Environ. Sci.*, 2016, **9**, 2410-2417.
- [2] K. Zhang, S. Ravishankar, M. Ma, G. Veerappan, J. Bisquert, F. Fabregat-Santiago, and J. H. Park, *Adv. Energy Mater.*, 2017, **7**, 1600923
- [3] Yi. Liu, F. Ren , S. She, J. Chen, Y. Fu, G. Cai , X. Wang, Z. Xing, L. Wu, X. Zheng, C Jiang, *Int. J. Hydrogen Energ.*, 2018, **43**, 2057-2063.
- [4] Y. He, P. Wang, J. Zhu, Y. Yang, Y. Liu, M. Chen, D. Cao, X. Yan, *ACS Appl. Mater. Interfaces*, 2019, **11**, 37322-37329.
- [5] H. Huang, X. Hou, J. Xiao, L. Zhao, Q. Huang, H. Chen, Y. Li, *Catalysis Today*, 2019, **330**, 189-194.
- [6] Z. Liang, H. Hou, Z. Fang, F. Gao, L. Wang, D. Chen, W. Yang, *ACS Appl. Mater. Interfaces*, 2019, **11**, 19167-19175.
- [7] I. S. Cho, M. Logar, C.H. Lee, L. Cai, F. B. Prinz, X. Zheng, *Nano Lett.*, 2014, **14**, 24-31.
